# Supplementary material for: A comprehensive analysis of cotton VQ gene superfamily reveals their potential and extensive roles in regulating cotton abiotic stress
Source: PubMed Central journal article supplement (PMC7667805; doi:10.1186/s12864-020-07171-z), 2020-11-16
Supplement: 12864_2020_7171_MOESM11_ESM.pdf [file 12864_2020_7171_MOESM11_ESM.pdf]

row min row max

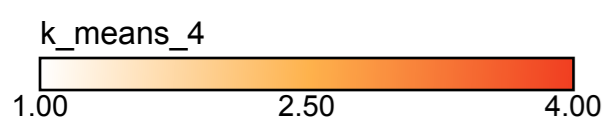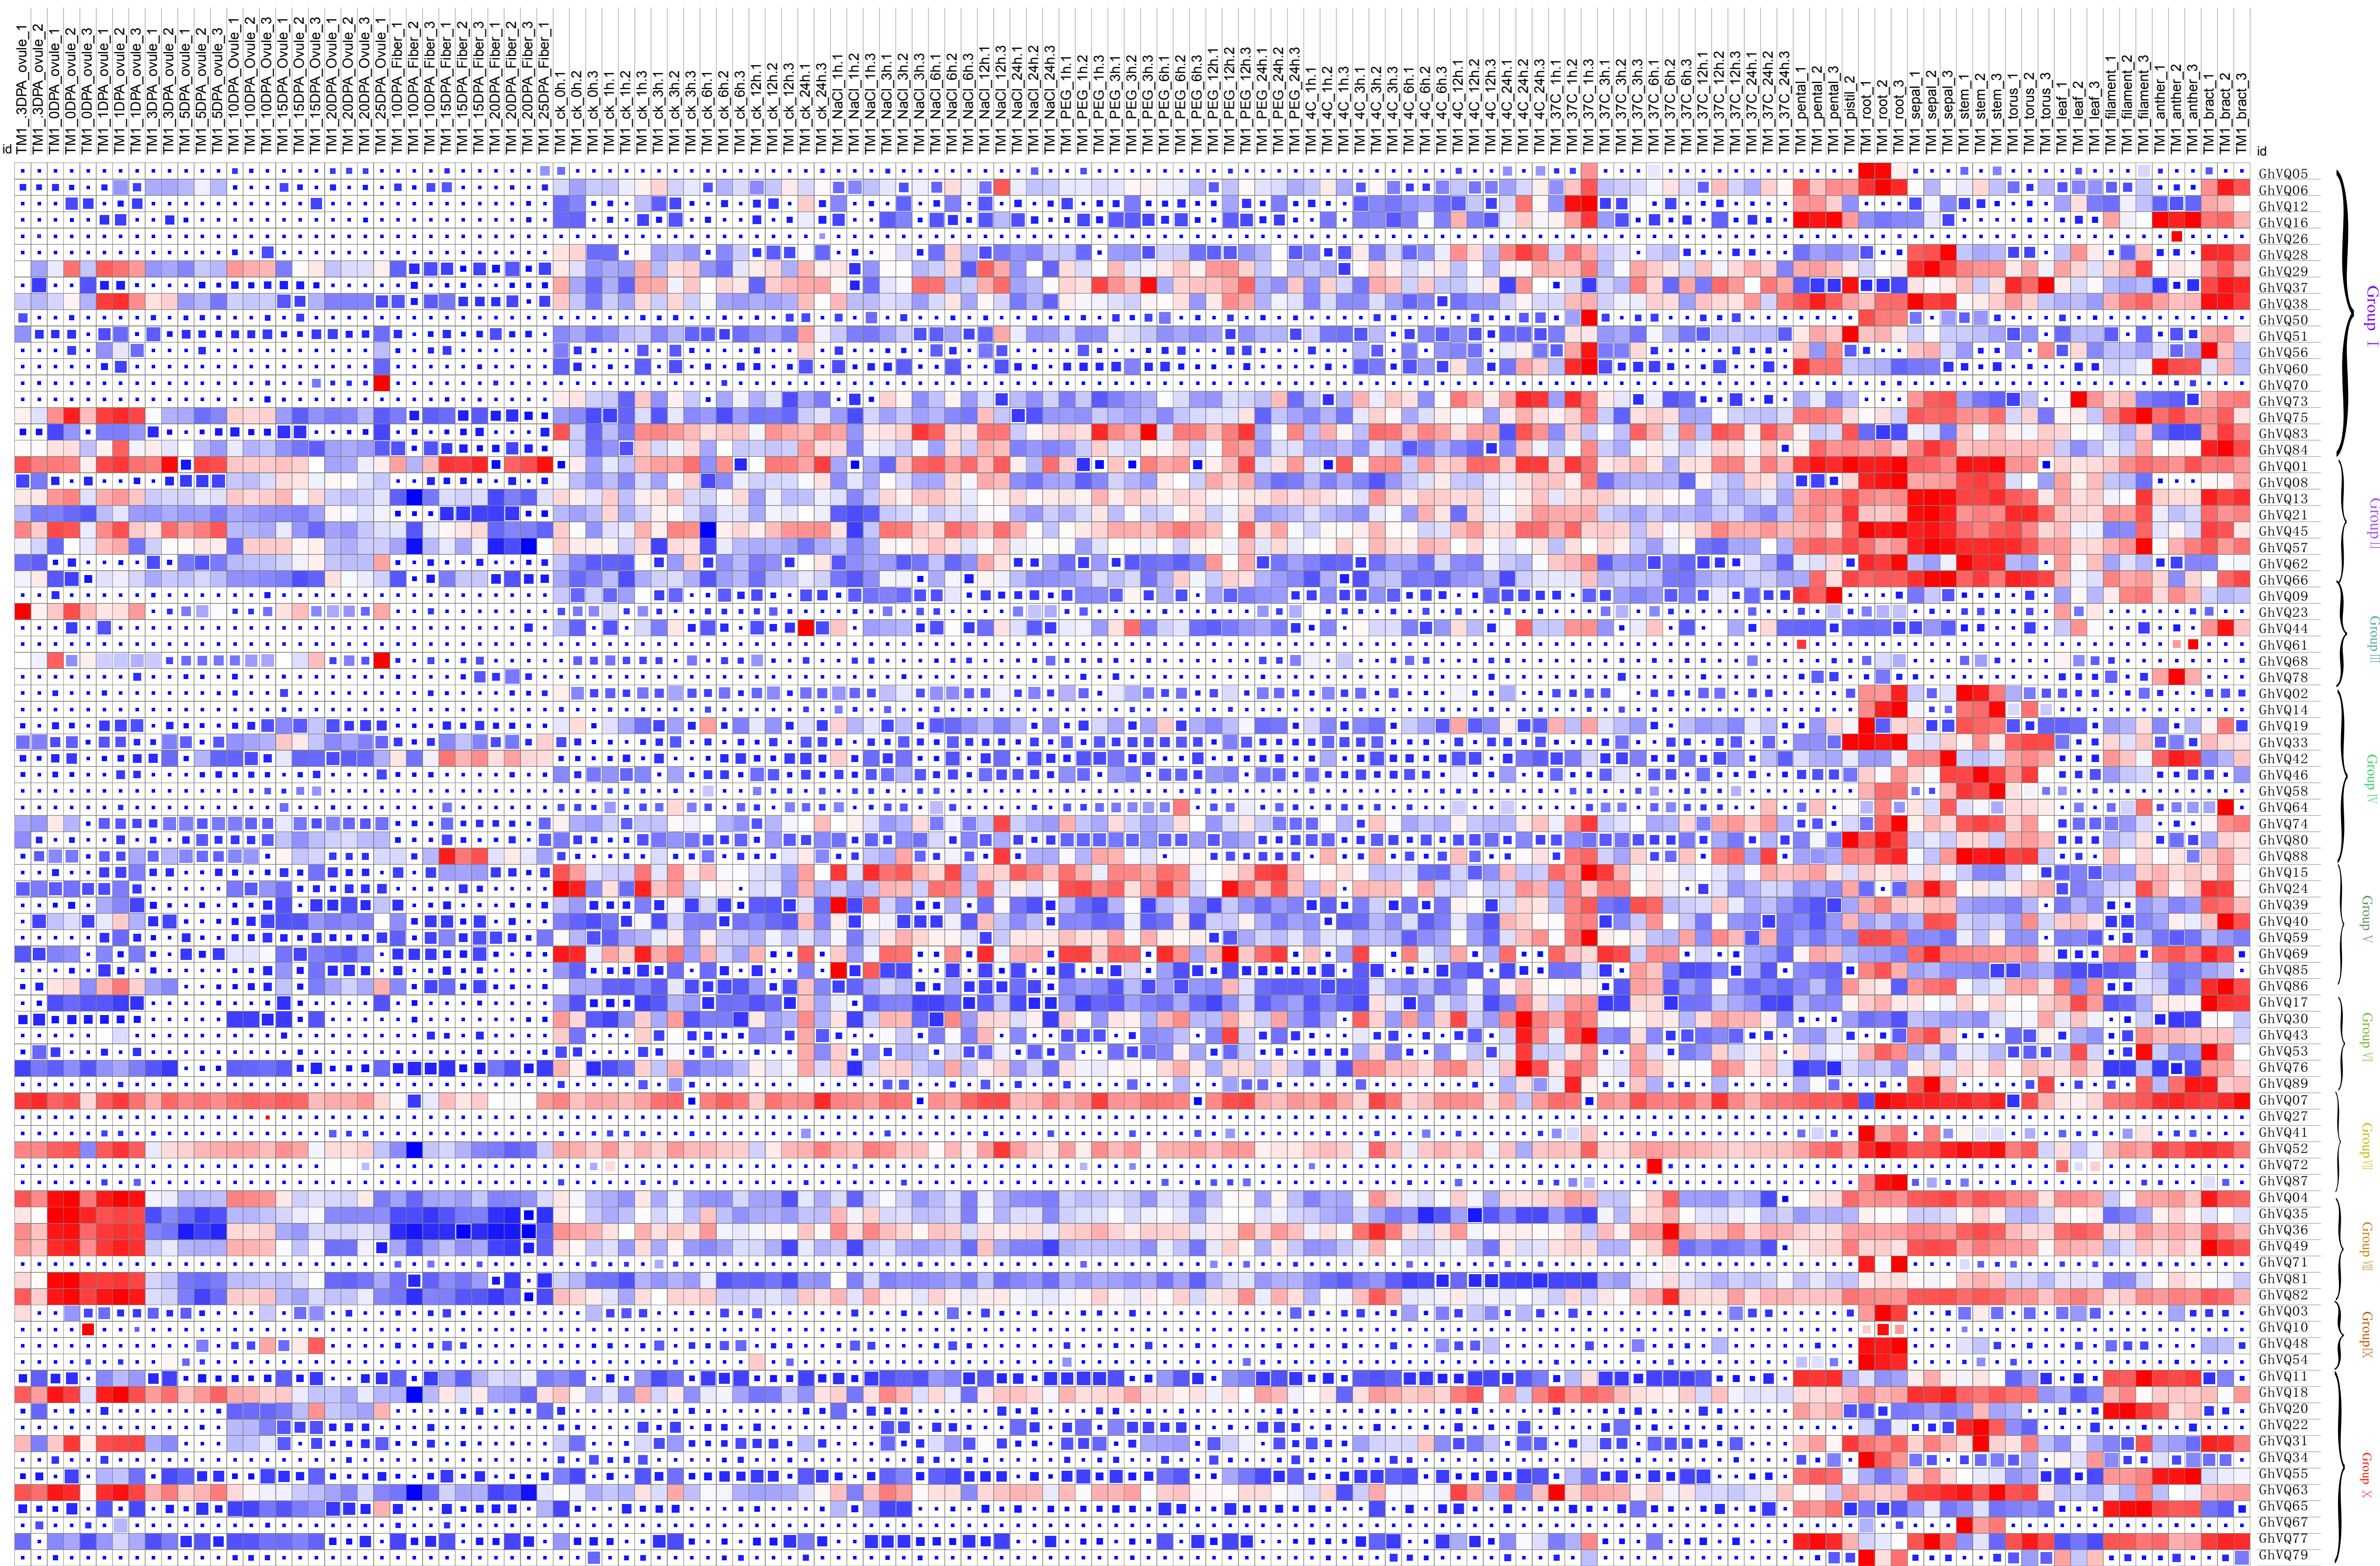

Group I  
Group II  
Group III  
Group IV  
Group V  
Group VI  
Group VII  
Group VIII  
Group IX  
Group X
