# Supplementary material for: A comprehensive analysis of cotton VQ gene superfamily reveals their potential and extensive roles in regulating cotton abiotic stress
Source: PubMed Central journal article supplement (PMC7667805; doi:10.1186/s12864-020-07171-z), 2020-11-16
Supplement: 12864_2020_7171_MOESM12_ESM.pdf [file 12864_2020_7171_MOESM12_ESM.pdf]

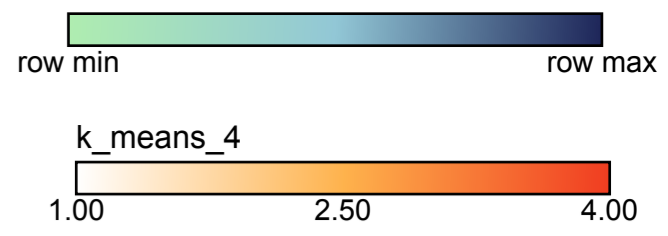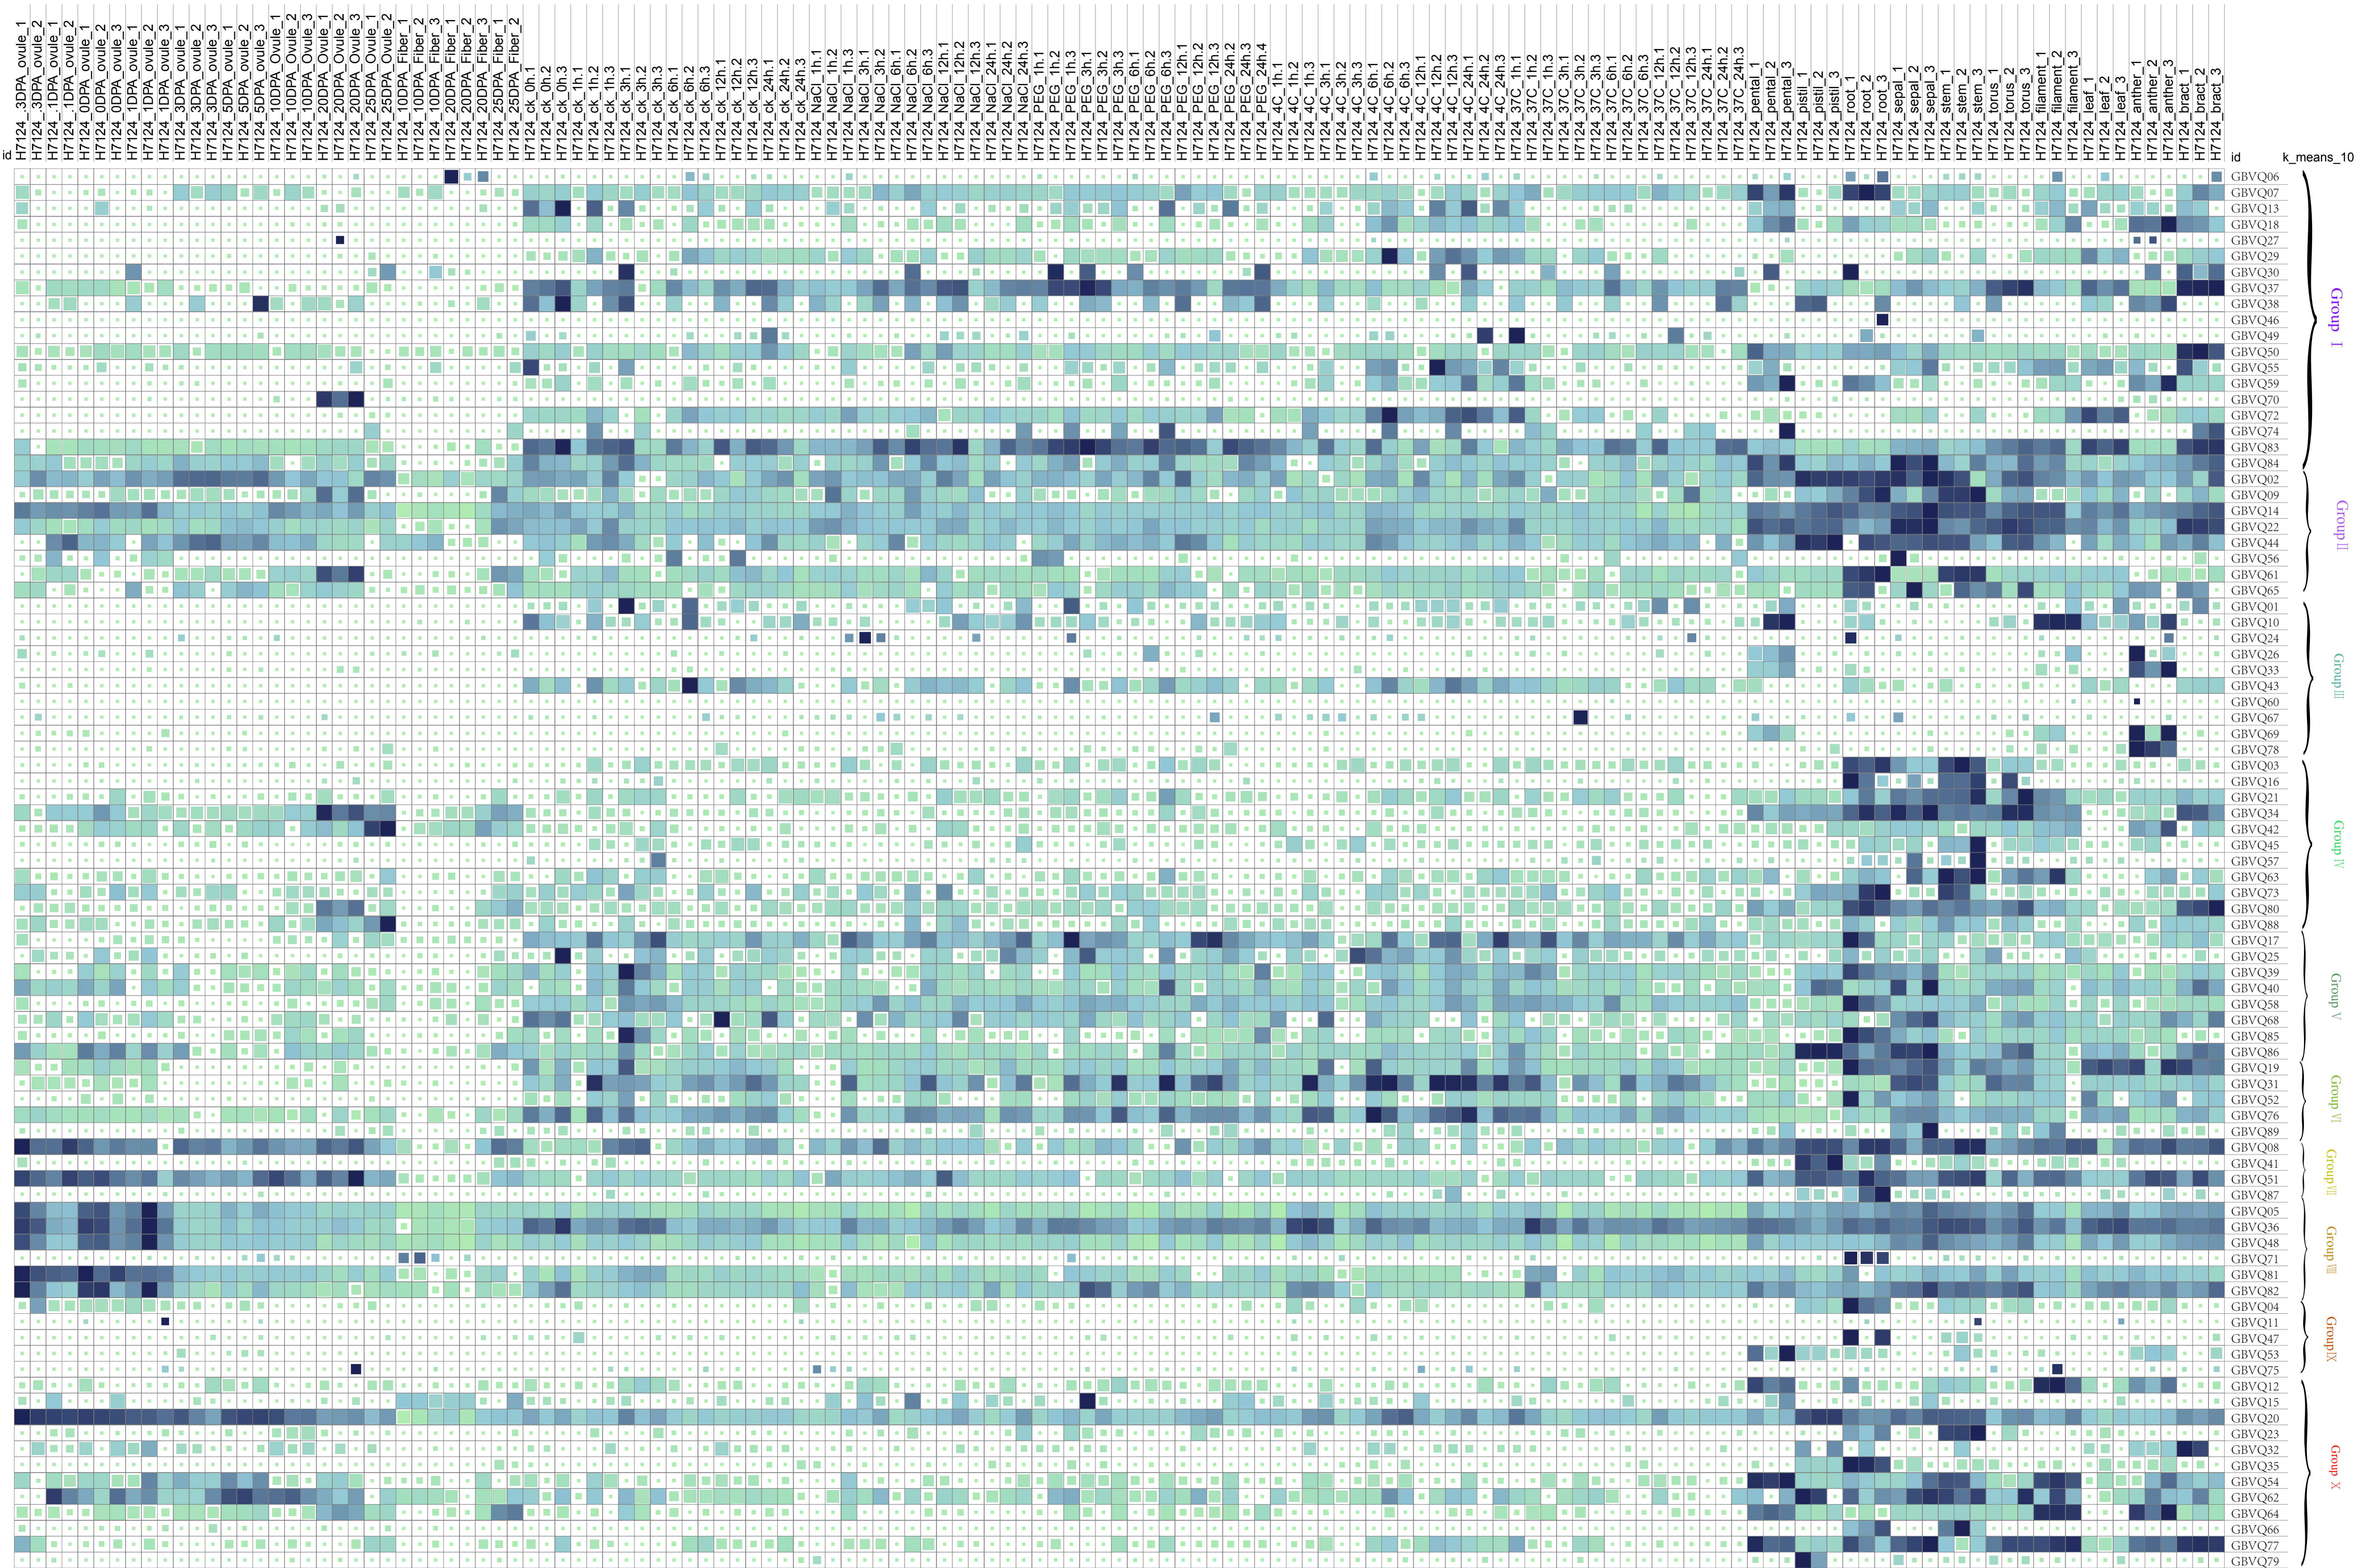

id k\_means\_10

GBVQ06  
GBVQ07  
GBVQ13  
GBVQ18  
GBVQ27  
GBVQ29  
GBVQ30  
GBVQ37  
GBVQ38  
GBVQ46  
GBVQ49  
GBVQ50  
GBVQ55  
GBVQ59  
GBVQ70  
GBVQ72  
GBVQ74  
GBVQ83  
GBVQ84  
GBVQ02  
GBVQ09  
GBVQ14  
GBVQ22  
GBVQ44  
GBVQ56  
GBVQ61  
GBVQ65  
GBVQ10  
GBVQ24  
GBVQ26  
GBVQ33  
GBVQ43  
GBVQ60  
GBVQ67  
GBVQ69  
GBVQ78  
GBVQ03  
GBVQ16  
GBVQ21  
GBVQ34  
GBVQ42  
GBVQ45  
GBVQ57  
GBVQ63  
GBVQ73  
GBVQ80  
GBVQ88  
GBVQ17  
GBVQ25  
GBVQ39  
GBVQ40  
GBVQ58  
GBVQ68  
GBVQ85  
GBVQ86  
GBVQ19  
GBVQ31  
GBVQ52  
GBVQ76  
GBVQ89  
GBVQ08  
GBVQ41  
GBVQ51  
GBVQ87  
GBVQ05  
GBVQ36  
GBVQ48  
GBVQ71  
GBVQ81  
GBVQ82  
GBVQ04  
GBVQ11  
GBVQ47  
GBVQ53  
GBVQ75  
GBVQ12  
GBVQ15  
GBVQ20  
GBVQ23  
GBVQ32  
GBVQ35  
GBVQ54  
GBVQ62  
GBVQ64  
GBVQ66  
GBVQ77  
GBVQ79

Group I  
Group II  
Group III  
Group IV  
Group V  
Group VI  
Group VII  
Group VIII  
Group IX  
Group X
