# Supplementary material for: A comprehensive analysis of cotton VQ gene superfamily reveals their potential and extensive roles in regulating cotton abiotic stress
Source: BMC Genomics. 2020 Nov 16;21:795. doi: 10.1186/s12864-020-07171-z (PMC7667805; doi:10.1186/s12864-020-07171-z)
Supplement: Supplementary file 9 — Additional file 9: Table S4. The duplicated type of VQs in Gossypium spp. The 0 to 4 indicate the singleton, dispersed, proximal, tandem, WGD duplication types, respectively. [file 12864_2020_7171_MOESM9_ESM.xlsx]

## Sheet: Sheet1
Additional file 9: Table S4 The duplicated type of VQ genes in Gossypium spp. The 0 to 4 indicate the singleton, dispersed, proximal, tandem, WGD duplication type, respectively.
Genes of At subgenome of G.hirsutum			Genes of Dt subgenome of G.hirsutum			Genes of At subgenome of G.barbadense			Genes of Dt subgenome of G.barbadense			Genes of G.raimondii				Genes of G.arboreum
Locus ID	Gene Name	copy number	Locus ID	Gene Name	copy number	Locus ID	Gene Name	copy number	Locus ID	Gene Name	copy number	Locus ID	Gene Name	copy number		Locus ID	Gene Name	copy number
GH_A01G0603	GhVQ01	4	GH_D01G0355	GhVQ44	4	GB_A01G0355	GBVQ01	4	GB_D01G0376	GBVQ43	4	Gorai.001G039000	GrVQ01	4		Ga01G0385	GaVQ01	4
GH_A01G1255	GhVQ02	1	GH_D01G0587	GhVQ45	4	GB_A01G0588	GBVQ02	4	GB_D01G0605	GBVQ44	4	Gorai.001G093400	GrVQ02	4		Ga01G0653	GaVQ02	4
GH_A01G2076	GhVQ03	4	GH_D01G1324	GhVQ46	1	GB_A01G1290	GBVQ03	1	GB_D01G1383	GBVQ45	1	Gorai.001G212200	GrVQ03	4		Ga01G1338	GaVQ03	1
GH_A01G2096	GhVQ04	1	GH_D01G1426	GhVQ47	1	GB_A01G2181	GBVQ04	4	GB_D01G1487	GBVQ46	4	Gorai.002G038600	GrVQ04	1		Ga01G1487	GaVQ04	1
GH_A01G2169	GhVQ05	1	GH_D01G2139	GhVQ48	4	GB_A01G2201	GBVQ05	1	GB_D01G2228	GBVQ47	1	Gorai.002G069400	GrVQ05	4		Ga01G2732	GaVQ05	1
GH_A02G1193	GhVQ06	1	GH_D01G2190	GhVQ49	1	GB_A01G2270	GBVQ06	1	GB_D01G2282	GBVQ48	1	Gorai.002G139900	GrVQ06	4		Ga02G1403	GaVQ06	4
GH_A03G0058	GhVQ07	4	GH_D01G2254	GhVQ50	1	GB_A02G1208	GBVQ07	1	GB_D01G2354	GBVQ49	4	Gorai.002G154000	GrVQ07	4		Ga02G1420	GaVQ07	1
GH_A04G0330	GhVQ08	4	GH_D03G0847	GhVQ51	1	GB_A03G0056	GBVQ08	4	GB_D03G0851	GBVQ50	1	Gorai.002G224500	GrVQ08	4		Ga02G1496	GaVQ08	1
GH_A04G0528	GhVQ09	1	GH_D03G1907	GhVQ52	4	GB_A04G0351	GBVQ09	4	GB_D03G1936	GBVQ51	4	Gorai.002G226300	GrVQ09	1		Ga04G1093	GaVQ09	1
GH_A04G0642	GhVQ10	4	GH_D04G0182	GhVQ53	4	GB_A04G0538	GBVQ10	4	GB_D04G0177	GBVQ52	4	Gorai.002G233400	GrVQ10	4		Ga04G1953	GaVQ10	4
GH_A05G0625	GhVQ11	4	GH_D04G0946	GhVQ54	4	GB_A04G0668	GBVQ11	4	GB_D04G0993	GBVQ53	1	Gorai.003G089500	GrVQ11	1		Ga05G0651	GaVQ11	4
GH_A05G1492	GhVQ12	4	GH_D05G0622	GhVQ55	4	GB_A05G0628	GBVQ12	4	GB_D05G0621	GBVQ54	4	Gorai.003G181800	GrVQ12	4		Ga05G1573	GaVQ12	4
GH_A05G1617	GhVQ13	4	GH_D05G1514	GhVQ56	4	GB_A05G1508	GBVQ13	4	GB_D05G1524	GBVQ55	4	Gorai.004G112000	GrVQ13	1		Ga05G1719	GaVQ13	4
GH_A05G2279	GhVQ14	4	GH_D05G1645	GhVQ57	4	GB_A05G1638	GBVQ14	4	GB_D05G1659	GBVQ56	4	Gorai.006G068000	GrVQ14	1		Ga05G2422	GaVQ14	4
GH_A05G2690	GhVQ15	4	GH_D05G2299	GhVQ58	4	GB_A05G2271	GBVQ15	4	GB_D05G2317	GBVQ57	4	Gorai.006G142700	GrVQ15	4		Ga05G2850	GaVQ15	4
GH_A05G3373	GhVQ16	1	GH_D05G2707	GhVQ59	4	GB_A05G2309	GBVQ16	4	GB_D05G2720	GBVQ58	4	Gorai.007G056800	GrVQ16	4		Ga05G3614	GaVQ16	1
GH_A05G4197	GhVQ17	4	GH_D05G3392	GhVQ60	1	GB_A05G2728	GBVQ17	4	GB_D05G3424	GBVQ59	1	Gorai.007G174400	GrVQ17	4		Ga05G3689	GaVQ17	4
GH_A06G0361	GhVQ18	4	GH_D05G3528	GhVQ61	4	GB_A05G3438	GBVQ18	1	GB_D05G3552	GBVQ60	4	Gorai.007G225500	GrVQ18	4		Ga05G3899	GaVQ18	4
GH_A06G0391	GhVQ19	4	GH_D05G3729	GhVQ62	4	GB_A05G4292	GBVQ19	4	GB_D05G3733	GBVQ61	4	Gorai.007G240000	GrVQ19	4		Ga06G0325	GaVQ19	4
GH_A06G1315	GhVQ20	4	GH_D06G0345	GhVQ63	1	GB_A06G0369	GBVQ20	4	GB_D06G0363	GBVQ62	1	Gorai.007G351100	GrVQ20	3		Ga06G0358	GaVQ20	4
GH_A06G1414	GhVQ21	4	GH_D06G0366	GhVQ64	4	GB_A06G0398	GBVQ21	4	GB_D06G0392	GBVQ63	4	Gorai.007G351200	GrVQ21	3		Ga06G1212	GaVQ21	4
GH_A07G0380	GhVQ22	4	GH_D06G1148	GhVQ65	4	GB_A06G1461	GBVQ22	4	GB_D06G1196	GBVQ64	4	Gorai.007G352700	GrVQ22	1		Ga06G1471	GaVQ22	4
GH_A07G0899	GhVQ23	4	GH_D06G1493	GhVQ66	4	GB_A07G0373	GBVQ23	4	GB_D06G1545	GBVQ65	4	Gorai.008G000200	GrVQ23	1		Ga07G0398	GaVQ23	4
GH_A07G0909	GhVQ24	4	GH_D07G0387	GhVQ67	4	GB_A07G0895	GBVQ24	4	GB_D07G0381	GBVQ66	4	Gorai.008G049400	GrVQ24	2		Ga07G0960	GaVQ24	4
GH_A08G0425	GhVQ25	1	GH_D07G0900	GhVQ68	4	GB_A07G0905	GBVQ25	4	GB_D07G0897	GBVQ67	4	Gorai.008G049600	GrVQ25	2		Ga07G0969	GaVQ25	4
GH_A08G1089	GhVQ26	1	GH_D07G0910	GhVQ69	4	GB_A07G2105	GBVQ26	4	GB_D07G0906	GBVQ68	4	Gorai.008G084600	GrVQ26	4		Ga07G2099	GaVQ26	4
GH_A08G1826	GhVQ27	4	GH_D08G1074	GhVQ70	1	GB_A08G1146	GBVQ27	1	GB_D07G2144	GBVQ69	4	Gorai.008G104800	GrVQ27	4		Ga08G1162	GaVQ27	1
GH_A10G0426	GhVQ28	4	GH_D09G1388	GhVQ71	1	GB_A08G1930	GBVQ28	4	GB_D08G1127	GBVQ70	1	Gorai.009G064400	GrVQ28	4		Ga10G0818	GaVQ28	4
GH_A10G0840	GhVQ29	1	GH_D09G2090	GhVQ72	4	GB_A10G0424	GBVQ29	4	GB_D09G1396	GBVQ71	1	Gorai.009G154700	GrVQ29	4		Ga10G1883	GaVQ29	1
GH_A10G2044	GhVQ30	4	GH_D10G0449	GhVQ73	4	GB_A10G0876	GBVQ30	1	GB_D10G0431	GBVQ72	4	Gorai.009G168800	GrVQ30	4		Ga10G2171	GaVQ30	1
GH_A11G0520	GhVQ31	4	GH_D10G1122	GhVQ74	4	GB_A10G2177	GBVQ31	4	GB_D10G1113	GBVQ73	1	Gorai.009G238300	GrVQ31	4		Ga10G2643	GaVQ31	4
GH_A11G1638	GhVQ32	0	GH_D10G1156	GhVQ75	1	GB_A11G0527	GBVQ32	4	GB_D10G1142	GBVQ74	1	Gorai.009G281800	GrVQ32	4		Ga11G0314	GaVQ32	1
GH_A11G2110	GhVQ33	4	GH_D10G2155	GhVQ76	4	GB_A11G1642	GBVQ33	4	GB_D10G1193	GBVQ75	1	Gorai.009G347500	GrVQ33	1		Ga11G0331	GaVQ33	3
GH_A11G2259	GhVQ34	4	GH_D11G0540	GhVQ77	4	GB_A11G2145	GBVQ34	4	GB_D10G2162	GBVQ76	4	Gorai.009G384400	GrVQ34	4		Ga11G0332	GaVQ34	3
GH_A11G3486	GhVQ35	3	GH_D11G1672	GhVQ78	4	GB_A11G2307	GBVQ35	4	GB_D11G0539	GBVQ77	4	Gorai.010G038300	GrVQ35	1		Ga11G1624	GaVQ35	4
GH_A11G3487	GhVQ36	3	GH_D11G2183	GhVQ79	4	GB_A11G3562	GBVQ36	1	GB_D11G1693	GBVQ78	4	Gorai.010G042200	GrVQ36	4		Ga11G1792	GaVQ36	4
GH_A11G3503	GhVQ37	0	GH_D11G2328	GhVQ80	4	GB_A11G3577	GBVQ37	0	GB_D11G2226	GBVQ79	4	Gorai.010G119600	GrVQ37	4		Ga11G2364	GaVQ37	4
GH_A12G0006	GhVQ38	1	GH_D11G3493	GhVQ81	3	GB_A12G0004	GBVQ38	1	GB_D11G2369	GBVQ80	4	Gorai.010G154500	GrVQ38	4		Ga11G3565	GaVQ38	4
GH_A12G0465	GhVQ39	2	GH_D11G3494	GhVQ82	3	GB_A12G0487	GBVQ39	2	GB_D11G3536	GBVQ81	3	Gorai.011G044800	GrVQ39	4		Ga12G1987	GaVQ39	1
GH_A12G0470	GhVQ40	2	GH_D11G3509	GhVQ83	0	GB_A12G0489	GBVQ40	2	GB_D11G3537	GBVQ82	3	Gorai.011G113000	GrVQ40	1		Ga12G2153	GaVQ40	4
GH_A12G0901	GhVQ41	4	GH_D12G0005	GhVQ84	1	GB_A12G0929	GBVQ41	4	GB_D11G3552	GBVQ83	0	Gorai.011G116000	GrVQ41	1		Ga12G2627	GaVQ41	2
GH_A12G1092	GhVQ42	4	GH_D12G0479	GhVQ85	2	GB_A12G1142	GBVQ42	1	GB_D12G0005	GBVQ84	1	Gorai.011G121400	GrVQ42	1		Ga12G2630	GaVQ42	2
GH_A13G1967	GhVQ43	0	GH_D12G0482	GhVQ86	2				GB_D12G0484	GBVQ85	2	Gorai.011G217100	GrVQ43	4		Ga12G2910	GaVQ43	1
			GH_D12G0916	GhVQ87	4				GB_D12G0487	GBVQ86	2	Gorai.012G018900	GrVQ44	4		Ga13G2127	GaVQ44	1
			GH_D12G1088	GhVQ88	4				GB_D12G0840	GBVQ87	4	Gorai.013G186400	GrVQ45	1		Ga14G0268	GaVQ45	1
			GH_D13G1932	GhVQ89	0				GB_D12G1128	GBVQ88	4
									GB_D13G2036	GBVQ89	0
		Gossypium barbadense		Gossypium hirsutum		Gossypium arboretum	Gossypium raimondii
	Type	At	Dt	At	Dt
singleton	0	1	2	3	2
dispersed	1	10	13	10	11	15	13
proximal	2	2	2	2	2	2	2
tandem	3	0	2	2	2	2	2
WGD/segmental	4	29	28	26	29	26	28
Note: 0, 1, 2, 3, 4 stand for singleton, dispersed, proximal, tandem, WGD/segmental,respectively.
Add. Users may use this program, which incorporates the MCScanX algorithm, to classify origins of
the duplicate genes of ONE genome into whole genome /segmental (i.e. collinear genes in
collinear blocks), tandem (consecutive repeat), proximal (in nearby chromosomal region but
not adjacent) or dispersed (other modes than segmental, tandem and proximal) duplications.
